# Deciphering the causal relationship between plasma and cerebrospinal fluid metabolites and glioblastoma multiforme: a Mendelian Randomization study

Zhiwei Zhou<sup>1</sup>, Haibin Leng<sup>1</sup>

<sup>1</sup>Department of Neurosurgery, Changde Hospital, Xiangya School of Medicine, Central South University (The First People's Hospital of Changde City), Changde, Hunan 415003, People's Republic of China

**Correspondence to:** Haibin Leng; email: [haibinleng\\_edu@163.com](mailto:haibinleng_edu@163.com), <https://orcid.org/0009-0007-3322-6929>

**Keywords:** glioblastoma multiforme, metabolites, Trimethylamine N-oxide, Mendelian Randomization, pathogenesis

**Received:** December 26, 2023      **Accepted:** April 10, 2024

**Published:** May 10, 2024

**Copyright:** © 2024 Zhou and Leng. This is an open access article distributed under the terms of the [Creative Commons Attribution License](https://creativecommons.org/licenses/by/4.0/) (CC BY 4.0), which permits unrestricted use, distribution, and reproduction in any medium, provided the original author and source are credited.

## ABSTRACT

**Background:** Glioblastoma Multiforme (GBM) is one of the most aggressive and fatal brain cancers. The study of metabolites could be crucial for understanding GBM's biology and reveal new treatment strategies.

**Methods:** The GWAS data for GBM were sourced from the FinnGen database. A total of 1400 plasma metabolites were collected from the GWAS Catalog dataset. The cerebrospinal fluid (CSF) metabolites data were collected from subsets of participants in the WADRC and WRAP studies. We utilized the inverse variance weighting (IVW) method as the primary tool to explore the causal relationship between metabolites in plasma and CSF and glioblastoma, ensuring the exclusion of instances with horizontal pleiotropy. Additionally, four supplementary analytical methods were applied to reinforce our findings. Aberrant results were identified and omitted based on the outcomes of the leave-one-out sensitivity analysis. Conclusively, a reverse Mendelian Randomization analysis was also conducted to further substantiate our results.

**Results:** The study identified 69 plasma metabolites associated with GBM. Of these, 40 metabolites demonstrated a significant positive causal relationship with GBM, while 29 exhibited a significant negative causal association. Notably, Trimethylamine N-oxide (TMAO) levels in plasma, not CSF, were found to be a significant exposure factor for GBM (OR = 3.1627, 95% CI = (1.6347, 6.1189),  $P = 0.0006$ ). The study did not find a reverse causal relationship between GBM and plasma TMAO levels.

**Conclusions:** This research has identified 69 plasma metabolites potentially associated with the incidence of GBM, among which TMAO stands out as a promising candidate for an early detectable biomarker for GBM.

## INTRODUCTION

Glioblastoma Multiforme (GBM) is among the most aggressive and fatal brain cancers, known for its rapid proliferation and diffuse infiltration into surrounding brain tissue [1]. Despite advancements in neuro-oncology, the prognosis for GBM remains dire, with median survival rates typically less than 15 months post-diagnosis [2–4]. The complexity of GBM pathogenesis, alongside its resilience against

conventional therapeutic regimens, underscores the critical need for novel diagnostic and therapeutic approaches [5].

Metabolomics, the extensive study of small molecules within biological systems, stands at the forefront of this challenge, offering promising potential to decipher the altered metabolic pathways associated with cancer phenotypes [6, 7]. Plasma metabolites, as downstream products of genetic, enzymatic, and cellular processes,

reflect the dynamic state of GBM's pathophysiology and therefore hold promise for revealing new facets of its biology [8–10]. The identification and in-depth analysis of these metabolites could unveil novel biomarkers that not only deepen our understanding of GBM's underpinnings but also pave the way for targeted treatment strategies. In parallel, cerebrospinal fluid (CSF) presents a distinctive lens into the brain's internal environment, potentially yielding critical insights into metabolic changes uniquely pertinent to neurological pathology [11–13]. Given its intimate association with the brain's extracellular space, CSF metabolomic analysis could offer a more direct evaluation of the biochemical environment that influences GBM's progression [14, 15].

To fully leverage the insights offered by metabolomics, the integration of genomic data from Genome-Wide Association Studies (GWAS) is essential [16]. GWAS provides a broad spectrum for identifying genetic variants that influence disease susceptibility and progression, including GBM [17–19]. By integrating GWAS findings with observed metabolic changes in both plasma and CSF, we can construct a more detailed portrait of GBM's pathogenesis. Utilizing this integrated approach, Mendelian Randomization (MR) analysis serves as a robust tool for deducing causality from observational data [20, 21]. MR utilizes genetic variants as instrumental variables to map the cause-effect trajectories between plasma metabolites and GBM, effectively bypassing the confounding variables that often confound observational studies [22, 23].

Therefore, this study is dedicated to investigating 1,400 plasma metabolites intricately connected to GBM's emergence and development. By pinpointing metabolites that hold a significant causal link to GBM, we seek to understand their biological significance and their viability as biomarkers or therapeutic agents. Moreover, we aim to corroborate these findings within CSF metabolites, enriching our comprehension of the

metabolic framework of GBM. Through MR analysis, our research strives to shed light on the metabolic processes that could be instrumental in GBM's oncogenesis and progression, ultimately contributing to the development of potential clinical interventions for this formidable ailment.

## MATERIALS AND METHODS

### Study design

Our approach was firmly rooted in adhering to the fundamental tenets of MR analysis. Firstly, we ensured a robust association exists between genetic variants and the exposure. Secondly, we ascertained that these genetic variants are not associated with potential confounding factors. Finally, we confirmed that the impact of genetic variants on the outcome is mediated exclusively through the exposure, without the influence of alternative biological pathways. Additionally, to reinforce the validity of our findings, a reverse MR analysis was conducted, leveraging significant results from the initial MR analysis to enhance the robustness of the outcomes.

The study's specific design and methodology are comprehensively illustrated in Figure 1. In our Mendelian Randomization analysis study, we employed the application of the Inverse Variance Weighted (IVW) method as our primary tool for analyzing a wide array of 1,400 plasma metabolites. The objective was to identify those metabolites that act as potential exposure factors influencing the pathogenesis of GBM. Following this initial identification, we delved deeper to ascertain the most significant causal relationships between these plasma metabolites and GBM, focusing on determining the extent of their impact on GBM development. A critical component of our study involved examining the possibility of reverse causation – whether the presence of GBM could influence the levels of these key plasma metabolites, thereby

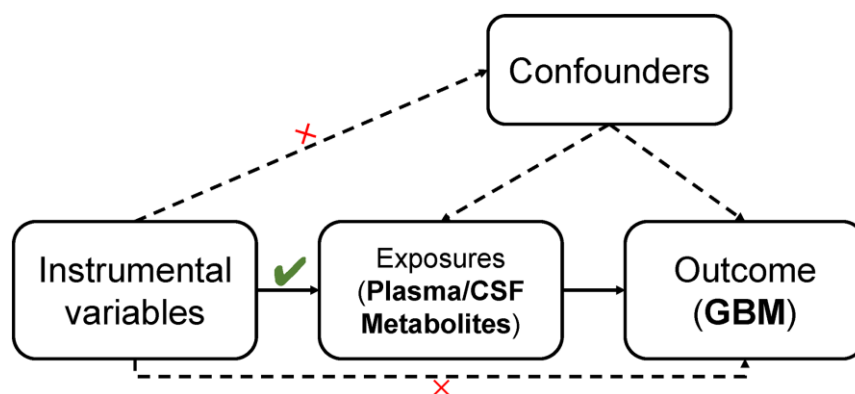

Figure 1. The whole MR study design.

exploring the bidirectional nature of their interactions. The investigation was further extended to include CSF, aiming to identify and compare the causal relationships of similar metabolites within CSF with GBM.

### **GWAS data sources of GBM**

For our study, the GWAS dataset specific to Glioblastoma Multiforme was sourced from the FinnGen database (<https://www.finnngen.fi>). The dataset originated from a detailed GWAS conducted on a cohort of European descent, comprising 243 individuals diagnosed with GBM, contrasted against a control group of 287,137 participants. In this comprehensive analysis, approximately 16.38 million genetic variants were meticulously examined. Each variant underwent rigorous quality control measures and was processed using advanced imputation methods.

### **Plasma metabolites GWAS data collection**

The collection of GWAS data for 1,400 plasma metabolites was conducted through a comprehensive approach, utilizing several datasets [24]. We sourced the GWAS summary statistics from the GWAS Catalog, available at EBI GWAS Catalog. This included a wide array of studies, categorized under specific accession numbers: GCST90199621 to GCST90201020 for European GWASs and GCST90201021 to GCST90204063 for non-European GWASs. In addition to these aggregated statistics, individual-level data for certain metabolites were obtained from the Canadian Longitudinal Study on Aging (CLSA), accessible at CLSA, where the data availability was contingent upon meeting stringent criteria for accessing de-identified CLSA data. This was in adherence to ethical standards and data privacy regulations. To further ensure the accuracy and pertinence of our metabolite analysis, we cross-referenced our findings with the Human Metabolome Database (HMDB). The assembly of these extensive and diverse range of GWAS data forms the bedrock of our rigorous Mendelian Randomization analysis, focusing on exploring the relationships between plasma metabolites and GBM.

### **CSF metabolites GWAS data collection**

Our research utilized GWAS summary datasets (<https://gwas.mrcieu.ac.uk>) focusing on cerebrospinal fluid metabolites. These datasets were derived from a subset of participants in the Wisconsin Alzheimer's Disease Research Center (WADRC) and the Wisconsin Registry for Alzheimer's Prevention (WRAP) studies. In these studies, CSF samples were collected via lumbar punctures (LPs). The collection and storage protocols for these samples were uniform across both

studies, as described in prior publication [25]. The procedure involved collecting fasting CSF samples from participants in the morning, which were then mixed, centrifuged, aliquoted, and stored at  $-80^{\circ}\text{C}$ . Metabolon performed an untargeted metabolomics analysis of these samples using Ultrahigh Performance Liquid Chromatography-Tandem Mass Spectrometry (UPLC-MS/MS), processing samples from both WADRC and WRAP on the same platform for consistency. In this analysis, 412 metabolites were quantified, with 354 identified and 58 of unknown structural identity. The study included 689 participants in total, with 532 from WADRC and 168 from WRAP, each providing unique CSF samples for metabolite analysis. The WADRC participants were selected based on criteria such as being aged  $\geq 45$ , having decisional capacity, and the ability to fast for 12 hours. Exclusion criteria encompassed a history of specific medical conditions like kidney dysfunction, congestive heart failure, major neurologic disorders (excluding dementia), and others. This study was a part of the Generations of WRAP (GROW) study and received approval from the University of Wisconsin Health Sciences Institutional Review Board.

### **Instrumental variable selection**

In line with established methodologies in contemporary research, we selected instrumental variables (IVs) for each plasma, CSF metabolites, and GBM using a significance threshold of  $1 \times 10^{-5}$ . The SNP clumping process, instrumental in reducing linkage disequilibrium (LD), was carried out utilizing PLINK software. This step involved setting an LD  $r^2$  threshold of less than 0.1 within a 500 kilobase (kb) window, referencing data from the 1000 Genomes Project, which is a methodological choice that reflects a careful consideration of the trade-offs between specificity, sensitivity, and computational feasibility in the context of genetic association studies. To evaluate the effectiveness of each IV, we calculated both the proportion of phenotypic variation explained (PVE) and the F statistic, with a focus on excluding weak instruments that could potentially skew the analysis. This study retained suitable IVs for further analysis, following the removal of those with F statistics falling below 10.

### **Mendelian Randomization analysis**

In our study, statistical analyses were performed using the R programming environment, specifically employing the "TwoSampleMR" package (version 0.5.7). This package facilitated the application of several MR methodologies, encompassing IVW, weighted median, mode-based estimation, MR-Egger, Simple mode, and Weighted mode approaches. These

methods were pivotal in establishing the causal relationships between identified exposures and outcomes. To evaluate the heterogeneity among instrumental variables (IVs), we utilized Cochran's Q statistic alongside its corresponding *p*-values. Where significant heterogeneity was identified, we opted for a random-effects model within the IVW method to accommodate variability across different IVs. The MR-Egger regression method was integral in assessing the presence of horizontal pleiotropy, with a focus on the intercept; a non-zero value was indicative of such pleiotropy. Additionally, we employed the MR-PRESSO technique for the identification and exclusion of outliers potentially exhibiting horizontal pleiotropy. Our analytical process also included the generation of scatter and funnel plots. These visual representations were crucial in verifying the consistency and robustness of our causal findings, thereby enhancing the reliability of our conclusions drawn from the MR analyses.

## RESULTS

### Mendelian Randomization analysis of 1,400 plasma metabolites' impact on GBM

In this study, we conducted a comprehensive MR analysis, focusing on 1,400 plasma metabolites as exposure factors. The analysis primarily utilized the IVW method, rigorously adjusting for linkage disequilibrium and potential confounders. Our objective was to elucidate metabolites critically involved in the pathogenesis and progression of GBM. As delineated in Table 1, among 69 plasma metabolites showing potential causal associations with GBM ( $p < 0.05$ ), Trimethylamine N-oxide levels were identified as the most significant factor potentially exacerbating GBM progression (OR = 3.1627, 95% CI = (1.6347, 6.1189),  $P = 0.0006$ ). Following in significance was Erucate (22:1n9), exhibiting an OR of 2.7360 and a 95% CI from 1.4258 to 5.2502 ( $P = 0.0025$ ). On the contrary, Cysteine S-sulfate levels appeared to demonstrate a notable protective effect, with an OR of 0.4536 and a 95% CI of (0.2461, 0.8359) ( $P = 0.0113$ ).

### Further investigation into the causal association between Trimethylamine N-oxide levels and GBM

Considering the significant positive causal relationship identified between plasma Trimethylamine N-oxide levels and the development of GBM, we conducted a detailed examination of this association. To encompass a broader set of instrumental variables (IVs), we employed a relaxed significance threshold of  $p < 1 \times 10^{-5}$ . This adjustment led to the inclusion of 15 single nucleotide polymorphisms (SNPs) in our analysis. Utilizing the IVW method, complemented by the

Weighted median approach, our findings affirm a significant causal relationship between Trimethylamine N-oxide levels and GBM, as evidenced by the *P*-values below the threshold of 0.05 (Figure 2A, 2B, and Supplementary Table 1). Moreover, our analyses did not detect any evidence of heterogeneity or horizontal pleiotropy, further substantiating the robustness of our results (Supplementary Table 1). To rigorously evaluate the robustness of our MR findings, we performed heterogeneity tests and conducted a leave-one-out sensitivity analysis. The MR-Egger intercept test, as depicted in Figure 2C, was utilized to assess the presence of horizontal pleiotropy among the instrumental variables. The results indicated by the intercept close to zero and the low  $I^2$  statistic suggest that there is no significant horizontal pleiotropy affecting our MR analysis. Figure 2D illustrates the results from the leave-one-out sensitivity analysis. We observed that the omission of no single SNP resulted in a substantial change in the overall causal estimate. The consistency of the effect estimates across this analysis further confirms the stability and reliability of our main findings, indicating that our MR analysis is not driven by any single SNP and that the association between plasma Trimethylamine N-oxide levels and GBM is not an artifact of any individual genetic variant used as an instrument. These analyses strengthen the evidence for a causal relationship between plasma Trimethylamine N-oxide levels and GBM progression.

### Investigating the causal effect of GBM on plasma Trimethylamine N-oxide levels

In a subsequent investigation to determine the potential influence of GBM on plasma Trimethylamine N-oxide levels, we conducted a reverse MR analysis. By setting a significance threshold of  $p < 1 \times 10^{-5}$ , we obtained 8 SNPs as instrumental variables for our reverse MR framework. Utilizing the Inverse Variance Weighted method in conjunction with four additional MR methodologies, it did not show a significant causal impact of GBM on plasma Trimethylamine N-oxide levels, with all *P*-values exceeding the 0.05 threshold (Figure 3A and Supplementary Table 2). Additionally, in the reverse analysis where GBM was posited as the exposure and plasma Trimethylamine N-oxide levels as the outcome, we found no substantial evidence of heterogeneity or horizontal pleiotropy (Supplementary Table 2). The collective insights from our MR analyses firmly suggest the absence of a causal relationship between GBM as an exposure factor and plasma Trimethylamine N-oxide levels as an outcome. This comprehensive approach underlines the one-directional nature of the association, where plasma Trimethylamine N-oxide levels potentially influence GBM risk but not vice versa (Figure 3A–3D).

**Table 1. Results of two-sample Mendelian Randomization analysis assessing the impact of 1,400 plasma metabolites on GBM, primarily utilizing inverse variance weighted methods.**

| ID                  | ReportedTrait                                                               | Sample      | Ancestry        | OR            | 95L OR        | 95H OR        | p-value       |
|---------------------|-----------------------------------------------------------------------------|-------------|-----------------|---------------|---------------|---------------|---------------|
| <b>GCST90199920</b> | <b>Trimethylamine n-oxide levels</b>                                        | <b>8218</b> | <b>European</b> | <b>3.1627</b> | <b>1.6347</b> | <b>6.1189</b> | <b>0.0006</b> |
| GCST90200284        | Erucate (22:1n9) levels                                                     | 8208        | European        | 2.7360        | 1.4258        | 5.2502        | 0.0025        |
| GCST90200662        | X-25790 levels                                                              | 8221        | European        | 2.4867        | 1.2349        | 5.0074        | 0.0107        |
| GCST90200528        | X-17146 levels                                                              | 7778        | European        | 2.2010        | 1.2886        | 3.7595        | 0.0039        |
| GCST90199677        | 3-methyl-2-oxobutyrate levels                                               | 8254        | European        | 2.1938        | 1.2298        | 3.9136        | 0.0078        |
| GCST90200173        | Glutamine conjugate of C6H10O2 (2) levels                                   | 8233        | European        | 2.1883        | 1.1261        | 4.2523        | 0.0209        |
| GCST90199765        | 4-hydroxyhippurate levels                                                   | 8259        | European        | 2.1799        | 1.2588        | 3.7750        | 0.0054        |
| GCST90199658        | Alpha-hydroxyisocaproate levels                                             | 8250        | European        | 2.1198        | 1.2361        | 3.6351        | 0.0063        |
| GCST90200843        | Adenosine 5'-monophosphate (AMP) to flavin adenine dinucleotide (FAD) ratio | 6188        | European        | 2.0472        | 1.2128        | 3.4558        | 0.0073        |
| GCST90200060        | 1-(1-enyl-palmitoyl)-2-linoleoyl-GPC (p-16:0/18:2) levels                   | 8260        | European        | 1.9522        | 1.1441        | 3.3311        | 0.0141        |
| GCST90199985        | Methyl-4-hydroxybenzoate sulfate levels                                     | 8285        | European        | 1.8924        | 1.1424        | 3.1347        | 0.0133        |
| GCST90199831        | 1-stearoyl-2-oleoyl-GPE (18:0/18:1) levels                                  | 8273        | European        | 1.8317        | 1.2630        | 2.6567        | 0.0014        |
| GCST90199988        | Tyramine O-sulfate levels                                                   | 7254        | European        | 1.8267        | 1.1027        | 3.0262        | 0.0193        |
| GCST90200037        | 1-stearoyl-2-linoleoyl-gpc (18:0/18:2) levels                               | 8231        | European        | 1.7909        | 1.1086        | 2.8933        | 0.0173        |
| GCST90199865        | 2-hydroxyglutarate levels                                                   | 7769        | European        | 1.7890        | 1.1744        | 2.7254        | 0.0068        |
| GCST90200328        | 3-methoxytyrosine levels                                                    | 8258        | European        | 1.7788        | 1.1579        | 2.7326        | 0.0086        |
| GCST90200968        | Phosphate to 5-oxoproline ratio                                             | 8217        | European        | 1.7612        | 1.2374        | 2.5069        | 0.0017        |
| GCST90200140        | Carotene diol (2) levels                                                    | 8196        | European        | 1.7488        | 1.1078        | 2.7607        | 0.0164        |
| GCST90200807        | Carnitine to ergothioneine ratio                                            | 8110        | European        | 1.7001        | 1.0482        | 2.7575        | 0.0315        |
| GCST90200454        | Kynurenate levels                                                           | 8241        | European        | 1.6522        | 1.1387        | 2.3973        | 0.0082        |
| GCST90199664        | Phenyllactate (PLA) levels in elite athletes                                | 8235        | European        | 1.6438        | 1.0680        | 2.5301        | 0.0239        |
| GCST90200080        | 1-palmitoyl-2-oleoyl-GPI (16:0/18:1) levels                                 | 8123        | European        | 1.6274        | 1.0701        | 2.4749        | 0.0228        |
| GCST90200281        | Phosphoethanolamine levels                                                  | 8253        | European        | 1.6239        | 1.0747        | 2.4537        | 0.0213        |
| GCST90200371        | 3-(4-hydroxyphenyl)lactate levels                                           | 8259        | European        | 1.6192        | 1.0070        | 2.6035        | 0.0467        |
| GCST90200883        | Phosphate to acetoacetate ratio                                             | 6791        | European        | 1.6149        | 1.0585        | 2.4639        | 0.0262        |
| GCST90200198        | 2-hydroxysebacate levels                                                    | 7865        | European        | 1.6146        | 1.0041        | 2.5964        | 0.0481        |
| GCST90199794        | 1-oleoyl-GPE (18:1) levels                                                  | 8283        | European        | 1.6144        | 1.0319        | 2.5256        | 0.0359        |
| GCST90200967        | Phosphate to urate ratio                                                    | 8204        | European        | 1.5890        | 1.0299        | 2.4517        | 0.0364        |
| GCST90200346        | 4-acetaminophen sulfate levels                                              | 4197        | European        | 1.5413        | 1.0477        | 2.2674        | 0.0280        |
| GCST90199732        | 1-stearoyl-gpc (18:0) levels                                                | 8240        | European        | 1.5352        | 1.0478        | 2.2493        | 0.0278        |
| GCST90199673        | DHEAS levels                                                                | 8228        | European        | 1.5243        | 1.0470        | 2.2192        | 0.0278        |
| GCST90200331        | 1-palmitoyl-2-oleoyl-GPE (16:0/18:1) levels                                 | 8262        | European        | 1.5240        | 1.1272        | 2.0603        | 0.0062        |
| GCST90200839        | Adenosine 5'-diphosphate (ADP) to aspartate ratio                           | 4563        | European        | 1.4796        | 1.0996        | 1.9909        | 0.0097        |
| GCST90199772        | 1-stearoyl-GPE (18:0) levels                                                | 8270        | European        | 1.4644        | 1.0411        | 2.0597        | 0.0284        |
| GCST90200144        | Dihomo-linoleoylcarnitine (C20:2) levels                                    | 7887        | European        | 1.4366        | 1.0226        | 2.0181        | 0.0367        |
| GCST90200082        | 1-oleoyl-2-linoleoyl-GPE (18:1/18:2) levels                                 | 8205        | European        | 1.4132        | 1.0659        | 1.8736        | 0.0162        |
| GCST90200603        | X-23641 levels                                                              | 6673        | European        | 1.3989        | 1.0215        | 1.9157        | 0.0364        |
| GCST90200039        | 1-stearoyl-2-linoleoyl-GPE (18:0/18:2) levels                               | 8241        | European        | 1.3935        | 1.0262        | 1.8923        | 0.0335        |
| GCST90199844        | 1-palmitoyl-2-linoleoyl-GPE (16:0/18:2) levels                              | 8266        | European        | 1.3276        | 1.0248        | 1.7199        | 0.0319        |
| GCST90200054        | 1-palmitoyl-2-arachidonoyl-GPE (16:0/20:4) levels                           | 8257        | European        | 1.3265        | 1.0027        | 1.7549        | 0.0478        |
| GCST90199660        | 1,2-dipalmitoyl-gpc (16:0/16:0) levels                                      | 8264        | European        | 0.7126        | 0.5125        | 0.9910        | 0.0440        |
| GCST90200014        | 3beta-hydroxy-5-cholestenoate levels                                        | 8259        | European        | 0.6775        | 0.4642        | 0.9887        | 0.0435        |
| GCST90200608        | X-22162 levels                                                              | 8249        | European        | 0.6746        | 0.4729        | 0.9623        | 0.0299        |
| GCST90200799        | Spermidine to adenosine 5'-diphosphate (ADP) ratio                          | 4195        | European        | 0.6723        | 0.4520        | 0.9999        | 0.0500        |

|              |                                                                   |      |          |        |        |        |        |
|--------------|-------------------------------------------------------------------|------|----------|--------|--------|--------|--------|
| GCST90200078 | 1-myristoyl-2-arachidonoyl-GPC (14:0/20:4) levels                 | 8264 | European | 0.6607 | 0.4567 | 0.9560 | 0.0279 |
| GCST90200788 | 5-oxoproline to citrate ratio                                     | 8256 | European | 0.6537 | 0.4380 | 0.9757 | 0.0375 |
| GCST90200500 | X-12816 levels                                                    | 5190 | European | 0.6478 | 0.4604 | 0.9115 | 0.0127 |
| GCST90199912 | N-oleoyltaurine levels                                            | 7375 | European | 0.6441 | 0.4257 | 0.9744 | 0.0373 |
| GCST90199888 | Cinnamoylglycine levels                                           | 7824 | European | 0.6357 | 0.4048 | 0.9985 | 0.0492 |
| GCST90200116 | Ceramide (d18:1/14:0, d16:1/16:0) levels                          | 7270 | European | 0.6217 | 0.4184 | 0.9240 | 0.0187 |
| GCST90200935 | Carnitine to propionylcarnitine (C3) ratio                        | 8185 | European | 0.6215 | 0.4062 | 0.9510 | 0.0284 |
| GCST90200802 | Histidine to pyruvate ratio                                       | 8241 | European | 0.6157 | 0.4144 | 0.9147 | 0.0163 |
| GCST90200090 | Dihomo-linolenoyl-choline levels                                  | 6954 | European | 0.6141 | 0.3777 | 0.9985 | 0.0493 |
| GCST90200873 | Cortisol to 4-cholesten-3-one ratio                               | 7027 | European | 0.6097 | 0.3801 | 0.9780 | 0.0402 |
| GCST90200349 | Eicosapentaenoate (EPA; 20:5n3) levels                            | 8257 | European | 0.6053 | 0.4108 | 0.8919 | 0.0111 |
| GCST90200620 | X-24243 levels                                                    | 7540 | European | 0.5927 | 0.3570 | 0.9841 | 0.0432 |
| GCST90200874 | Cysteinylglycine to taurine ratio                                 | 8193 | European | 0.5869 | 0.3684 | 0.9349 | 0.0249 |
| GCST90199983 | 5alpha-androstan-3alpha,17beta-diol monosulfate (2) levels        | 5920 | European | 0.5756 | 0.3590 | 0.9227 | 0.0218 |
| GCST90200846 | Phenylalanine to phosphate ratio                                  | 8294 | European | 0.5740 | 0.3537 | 0.9315 | 0.0246 |
| GCST90200978 | Caffeine to paraxanthine ratio                                    | 7873 | European | 0.5389 | 0.3489 | 0.8324 | 0.0053 |
| GCST90200483 | X-12216 levels                                                    | 8181 | European | 0.5330 | 0.3296 | 0.8618 | 0.0103 |
| GCST90200100 | Perfluorooctanesulfonate (PFOS) levels                            | 8218 | European | 0.5296 | 0.3460 | 0.8107 | 0.0034 |
| GCST90200944 | Alpha-ketoglutarate to pyruvate ratio                             | 8272 | European | 0.5290 | 0.2813 | 0.9950 | 0.0482 |
| GCST90199801 | Hydroquinone sulfate levels                                       | 7682 | European | 0.5164 | 0.2932 | 0.9095 | 0.0221 |
| GCST90200367 | 3-Hydroxybutyrate levels                                          | 8292 | European | 0.5109 | 0.2641 | 0.9884 | 0.0461 |
| GCST90200043 | 1-palmitoyl-2-docosaheptaenoyl-gpc (16:0/22:6) levels             | 8256 | European | 0.4961 | 0.3083 | 0.7982 | 0.0039 |
| GCST90200727 | Adenosine 3',5'-cyclic monophosphate (cAMP) to taurocholate ratio | 6329 | European | 0.4906 | 0.2794 | 0.8617 | 0.0132 |
| GCST90200221 | Glycoursodeoxycholic acid sulfate (1) levels                      | 6622 | European | 0.4882 | 0.3176 | 0.7506 | 0.0011 |
| GCST90199671 | Cysteine s-sulfate levels                                         | 8229 | European | 0.4536 | 0.2461 | 0.8359 | 0.0113 |

### Exploration of cerebrospinal fluid Trimethylamine N-oxide levels in GBM causality

In an extension of our investigation into potential causal factors for GBM, we explored whether Trimethylamine N-oxide levels in CSF could also serve as an influencing factor for the development and progression of GBM. Utilizing the ebi-a-GCST90026279 dataset, we analyzed 291 European CSF samples. A significance threshold of  $p < 1 \times 10^{-5}$  allowed us to identify 56 SNPs as instrumental variables for CSF Trimethylamine N-oxide Levels. Our analysis, employing the Inverse Variance Weighted method alongside four additional MR methodologies, did not demonstrate a significant causal effect of Trimethylamine N-oxide levels in CSF on GBM. All P-values were above the 0.05 threshold, indicating no statistically significant causal relationship (Figure 4A, 4B and Supplementary Table 3). Furthermore, we observed no substantial evidence of heterogeneity or horizontal pleiotropy in these analyses (Supplementary Table 3 and Figure 4C, 4D). These collective findings from our MR analyses imply that there is no causal link between Trimethylamine N-oxide levels in CSF as an exposure factor and GBM as an outcome.

### DISCUSSION

The findings of this study represent a potential advancement in our understanding of the metabolic processes involved in GBM pathogenesis. Our Mendelian Randomization analysis of 1,400 plasma metabolites has identified 69 kinds of metabolites that appear to be associated with the risk and progression of GBM, most notably TMAO levels. This metabolite's positive association with GBM development indicates its potential role in the pathophysiological mechanisms underlying this malignancy.

TMAO is an organic compound synthesized in the liver from trimethylamine (TMA), a byproduct of gut microbiota metabolism of nutrients dense in choline and carnitine, predominantly sourced from red meat, eggs, and dairy products [26]. The compound has come into scientific focus due to its associations with a variety of diseases, most notably cardiovascular disorders [27]. Its role in oncology is gaining interest, as emerging studies suggest potential mechanisms by which TMAO may influence cancer progression [9, 28, 29]. The promotion of inflammation, a recognized hallmark of cancer, has been considered to be associated with elevated levels

of TMAO [30, 31]. Chronic inflammation is known to play a role in the initiation and advancement of tumor development [32, 33]. Furthermore, TMAO is thought to modulate immune responses, potentially impacting the body's capacity to combat tumor cells [30]. Additionally, TMAO may affect cellular signaling

pathways that are crucial for cell proliferation and survival [34], as well as contribute to oxidative stress [35], which can lead to enhanced tumor growth [34]. Nevertheless, the exact mechanisms by which TMAO may influence cancer pathogenesis, including that of GBM or other solid tumors, remain inadequately

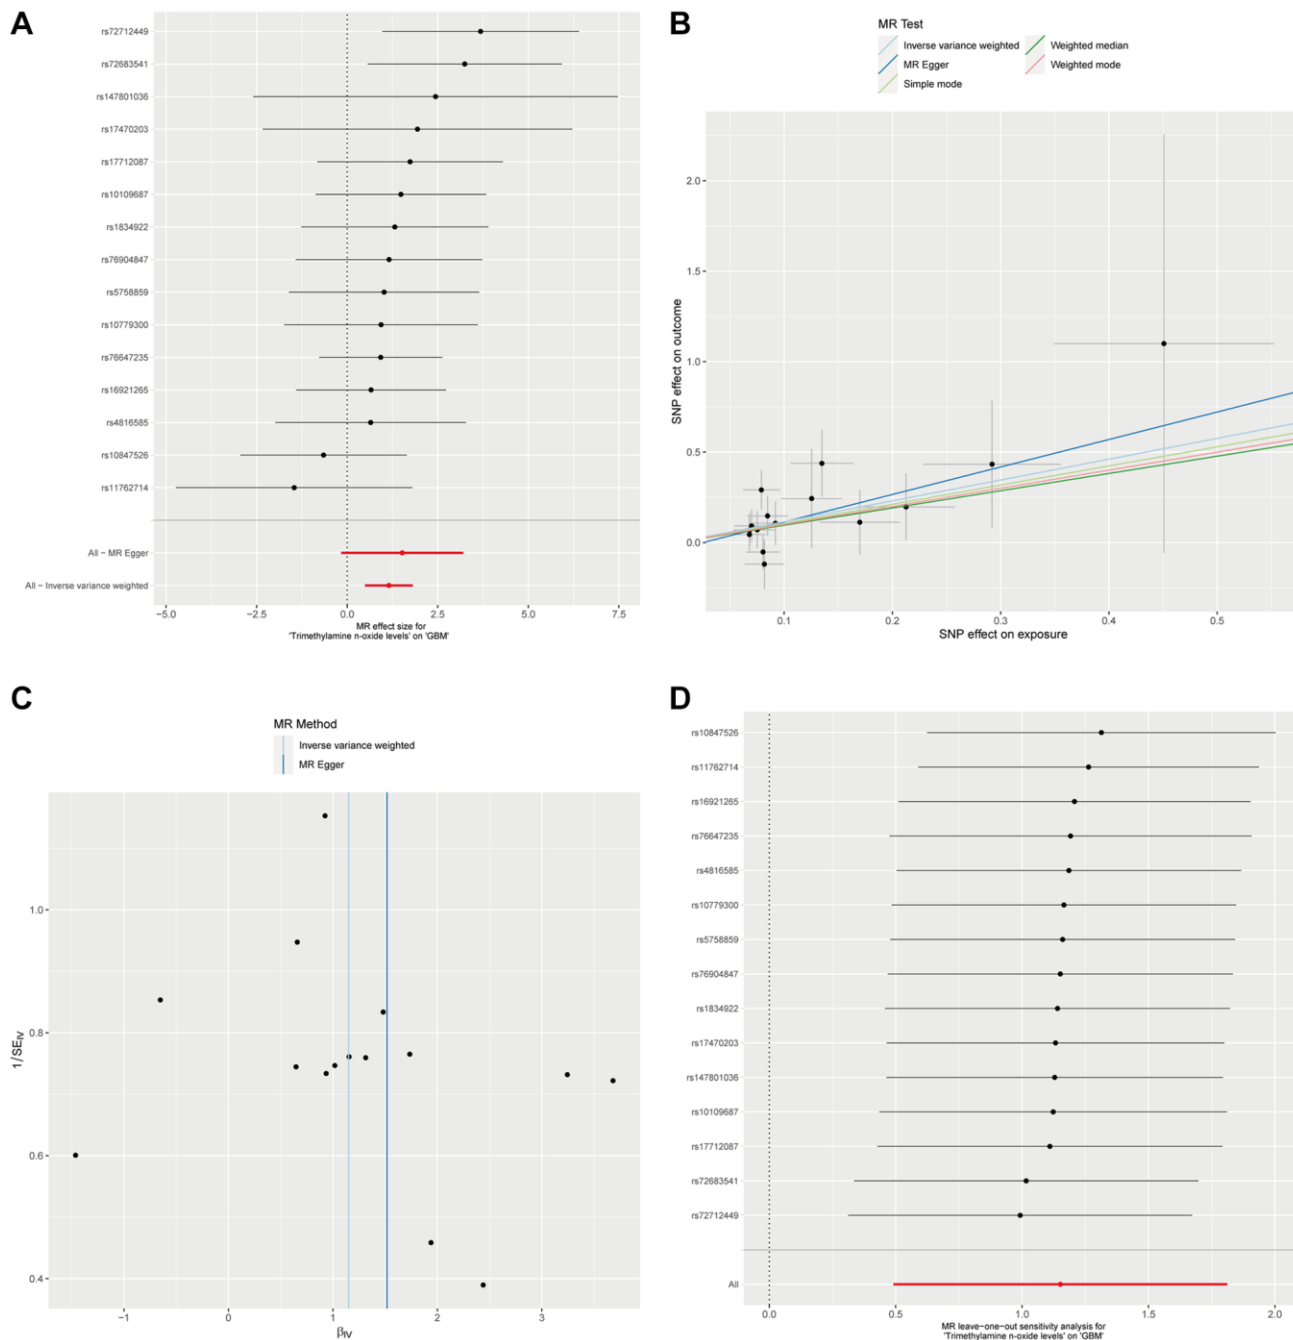

**Figure 2. The causal association between plasma Trimethylamine N-oxide and GBM.** (A) Forest plot illustrating ORs and 95% CIs for the association, with individual SNPs represented by black squares and their CIs by horizontal lines; the pooled OR is indicated by a red line. (B) Scatter plot showing SNP effects on TMAO levels versus GBM risk, with lines for different MR methods showing the causal relationship's direction and strength. (C) MR-Egger intercept test assessing horizontal pleiotropy, where the x-axis intercept value indicates pleiotropy presence, and the  $I^2$  statistic on the y-axis shows instrumental variable heterogeneity; a vertical blue line shows the null intercept, suggesting no pleiotropy. (D) Leave-one-out sensitivity analysis indicating the stability of the causal estimate across SNPs, with a consistent overall estimate shown by a red line, suggesting no individual SNP significantly alters the MR estimate.

defined. TMAO's impact may be direct, through interactions with tumor cells, or indirect, by altering the tumor microenvironment or systemic metabolism.

The association between TMAO and GBM identified in this study suggests its potential utility as a non-invasive

biomarker for early detection or monitoring of disease progression, which could be particularly beneficial in clinical settings where current primary diagnostic methods are invasive. Our findings suggest that dietary modifications to reduce TMAO production—a strategy potentially involving decreased consumption of red

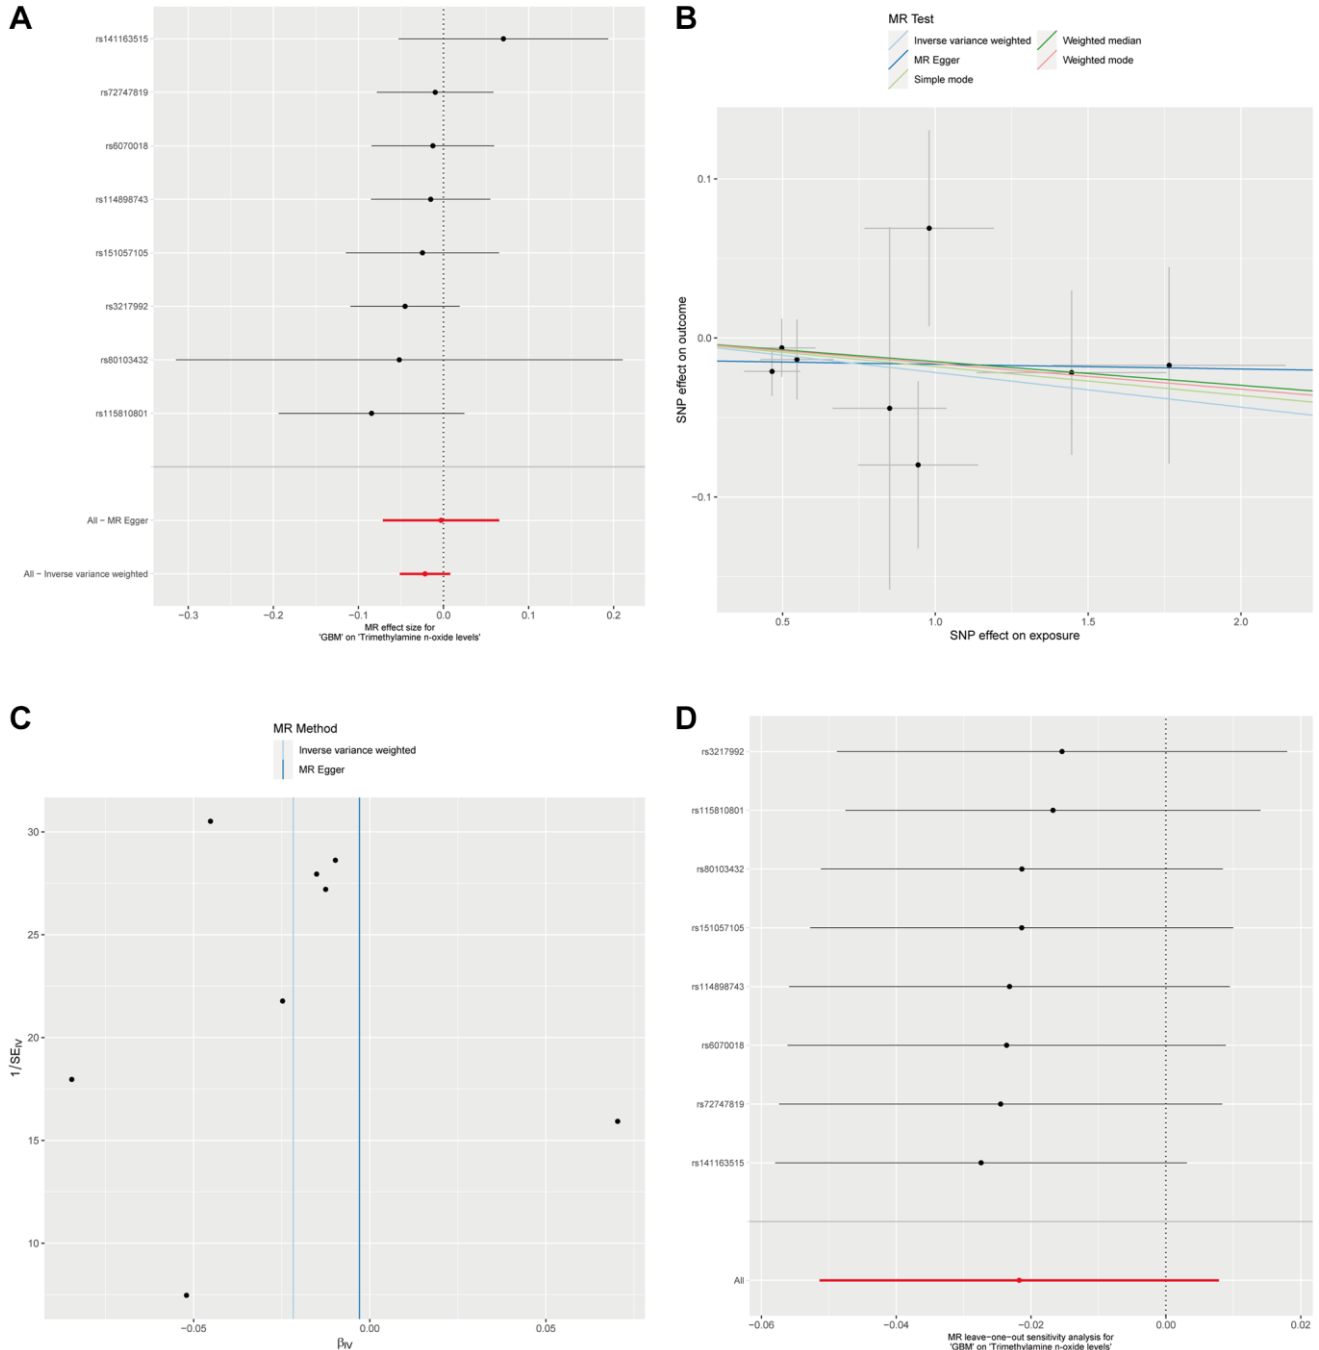

**Figure 3. Analysis of GBM Impact on plasma Trimethylamine N-oxide levels via reverse MR. (A)** Forest plot for the reverse MR analysis of GBM's effect on Trimethylamine N-oxide levels. **(B)** This scatter plot maps the SNP effects on GBM against their effects on plasma Trimethylamine N-oxide levels, applying various MR methods. **(C)** Displayed is the MR-Egger intercept test for the reverse MR analysis. The proximity of the intercept to the zero line and the lack of deviation indicates no evidence of horizontal pleiotropy in the analysis. **(D)** The leave-one-out sensitivity analysis for the reverse MR is shown here, demonstrating the effect size stability when each SNP is sequentially excluded.





The discrepancy between the role of TMAO levels in CSF and plasma in relation to GBM can be attributed to several factors. CSF and plasma have distinct biochemical compositions and serve different physiological functions [36]. Plasma is involved in systemic circulation and reflects metabolic processes occurring throughout the body [37]. In contrast, CSF is more localized to the brain and spinal cord, indicating that the metabolic environment in the brain might be distinct from systemic circulation [38], and thus the levels of TMAO in CSF and plasma could be influenced by different factors. Furthermore, the Blood-Brain Barrier (BBB) plays a crucial role in separating the brain's microenvironment from the systemic circulation [39–41]. It is highly selective in what it allows to pass through [41]. This barrier could mean that while elevated TMAO levels in plasma might influence GBM risk or progression, these effects do not necessarily translate to similar alterations in CSF TMAO levels. In addition, the production and metabolism of TMAO are primarily located in the liver and influenced by gut microbiota [42–44]. Given the liver's systemic connection and the BBB's selective permeability, this could result in differing impacts of TMAO on GBM [45]. The findings suggest that systemic metabolic changes (reflected in plasma) might play a more significant role in GBM's pathogenesis than localized metabolic alterations within the brain or spinal cord (reflected in CSF) [46]. In addition, the findings reinforce the potential of blood biomarkers, TMAO, in GBM risk assessment and early detection, which could be more accessible and less invasive than biomarkers in CSF.

Our study, while providing valuable insights into the association between TMAO levels and GBM, faces several limitations. The analysis is based on data from a specific population, which may not accurately represent the diverse genetic, dietary, and environmental factors influencing TMAO levels and GBM risk across different demographic groups, thus limiting the generalizability of our findings. Additionally, our study does not delve into the underlying biological mechanisms by which TMAO might influence GBM pathogenesis. Lastly, it is imperative to conduct extensive, multi-center validation studies to ascertain TMAO's efficacy across varied demographics, thereby establishing its sensitivity, specificity, and predictive value for GBM. Developing standardized measurement protocols for TMAO, including reference ranges and assay reproducibility, is essential. Identifying the optimal clinical context for TMAO measurement—be it for screening, differential diagnosis, or monitoring—is crucial. Clinical trials will further evaluate TMAO's integration into diagnostic and therapeutic regimes, assessing its contribution to patient outcomes. Challenges such as dietary and

microbiome influences on TMAO levels necessitate comprehensive adjustments in studies, while the precision of TMAO measurement techniques must be continuously advanced and validated. Moreover, increasing clinician awareness and understanding of TMAO's biomarker potential through education and consensus building is vital, alongside assessing the cost-effectiveness of TMAO testing for practical applicability. Transitioning TMAO from a research biomarker to a clinical tool encompasses tackling scientific, technical, and logistical hurdles, necessitating collaborative and iterative efforts to harness its full potential in enhancing GBM patient care and outcomes.

In conclusion, our extensive analysis of 1,400 plasma metabolites has successfully identified 69 metabolites that are associated with GBM. Our findings highlight the potential of plasma metabolites, particularly TMAO, as biomarkers for GBM, offering a promising avenue for early detection and risk assessment.

## Abbreviations

GBM: Glioblastoma Multiforme; TMAO: Trimethylamine N-oxide; MR: Mendelian Randomization; GWAS: Genome-Wide Association Study; IVW: Inverse Variance Weighted; WM: Weighted Median; IVs: Instrumental Variables; SNPs: Single Nucleotide Polymorphisms; MR-PRESSO: Mendelian Randomization Pleiotropy RESidual Sum and Outlier; IEU: Integrative Epidemiology Unit; CSF: Cerebrospinal fluid.

## AUTHOR CONTRIBUTIONS

ZWZ contributed to the conception and design of this study. ZWZ and HBL contributed to the analysis and interpretation of data. ZWZ collaborated closely with HBL in project oversight. All authors read and approved the final manuscript.

## CONFLICTS OF INTEREST

The authors declare no conflicts of interest related to this study.

## FUNDING

No funding was used for this paper.

## REFERENCES

1. Louis DN, Perry A, Wesseling P, Brat DJ, Cree IA, Figarella-Branger D, Hawkins C, Ng HK, Pfister SM, Reifenberger G, Soffietti R, von Deimling A, Ellison DW. The 2021 WHO Classification of Tumors of the

- Central Nervous System: a summary. *Neuro Oncol.* 2021; 23:1231–51.  
<https://doi.org/10.1093/neuonc/noab106>  
PMID:[34185076](https://pubmed.ncbi.nlm.nih.gov/34185076/)
2. Aldoghachi AF, Aldoghachi AF, Breyne K, Ling KH, Cheah PS. Recent Advances in the Therapeutic Strategies of Glioblastoma Multiforme. *Neuroscience.* 2022; 491:240–70.  
<https://doi.org/10.1016/j.neuroscience.2022.03.030>  
PMID:[35395355](https://pubmed.ncbi.nlm.nih.gov/35395355/)
  3. Lah TT, Novak M, Breznik B. Brain malignancies: Glioblastoma and brain metastases. *Semin Cancer Biol.* 2020; 60:262–73.  
<https://doi.org/10.1016/j.semcancer.2019.10.010>  
PMID:[31654711](https://pubmed.ncbi.nlm.nih.gov/31654711/)
  4. Kumari S, Gupta R, Ambasta RK, Kumar P. Multiple therapeutic approaches of glioblastoma multiforme: From terminal to therapy. *Biochim Biophys Acta Rev Cancer.* 2023; 1878:188913.  
<https://doi.org/10.1016/j.bbcan.2023.188913>  
PMID:[37182666](https://pubmed.ncbi.nlm.nih.gov/37182666/)
  5. Yuan B, Wang G, Tang X, Tong A, Zhou L. Immunotherapy of glioblastoma: Recent advances and future prospects. *Hum Vaccin Immunother.* 2022; 18:2055417.  
<https://doi.org/10.1080/21645515.2022.2055417>  
PMID:[35344682](https://pubmed.ncbi.nlm.nih.gov/35344682/)
  6. Bauermeister A, Mannocho-Russo H, Costa-Lotufo LV, Jarmusch AK, Dorrestein PC. Mass spectrometry-based metabolomics in microbiome investigations. *Nat Rev Microbiol.* 2022; 20:143–60.  
<https://doi.org/10.1038/s41579-021-00621-9>  
PMID:[34552265](https://pubmed.ncbi.nlm.nih.gov/34552265/)
  7. Xiao L, Wang C, Dai C, Littlepage LE, Li J, Schultz ZD. Untargeted Tumor Metabolomics with Liquid Chromatography-Surface-Enhanced Raman Spectroscopy. *Angew Chem Int Ed Engl.* 2020; 59:3439–43.  
<https://doi.org/10.1002/anie.201912387>  
PMID:[31765069](https://pubmed.ncbi.nlm.nih.gov/31765069/)
  8. Sullivan MR, Danai LV, Lewis CA, Chan SH, Gui DY, Kunchok T, Dennstedt EA, Vander Heiden MG, Muir A. Quantification of microenvironmental metabolites in murine cancers reveals determinants of tumor nutrient availability. *Elife.* 2019; 8:e44235.  
<https://doi.org/10.7554/eLife.44235>  
PMID:[30990168](https://pubmed.ncbi.nlm.nih.gov/30990168/)
  9. Wang H, Rong X, Zhao G, Zhou Y, Xiao Y, Ma D, Jin X, Wu Y, Yan Y, Yang H, Zhou Y, Qian M, Niu C, et al. The microbial metabolite trimethylamine N-oxide promotes antitumor immunity in triple-negative breast cancer. *Cell Metab.* 2022; 34:581–94.e8.  
<https://doi.org/10.1016/j.cmet.2022.02.010>  
PMID:[35278352](https://pubmed.ncbi.nlm.nih.gov/35278352/)
  10. Hsia T, Yekula A, Batool SM, Rosenfeld YB, You DG, Weissleder R, Lee H, Carter BS, Balaj L. Glioblastoma-derived extracellular vesicle subpopulations following 5-aminolevulinic acid treatment bear diagnostic implications. *J Extracell Vesicles.* 2022; 11:e12278.  
<https://doi.org/10.1002/jev2.12278>  
PMID:[36404434](https://pubmed.ncbi.nlm.nih.gov/36404434/)
  11. Miller AM, Shah RH, Pentsova EI, Pourmaleki M, Briggs S, Distefano N, Zheng Y, Skakodub A, Mehta SA, Campos C, Hsieh WY, Selcuklu SD, Ling L, et al. Tracking tumour evolution in glioma through liquid biopsies of cerebrospinal fluid. *Nature.* 2019; 565:654–8.  
<https://doi.org/10.1038/s41586-019-0882-3>  
PMID:[30675060](https://pubmed.ncbi.nlm.nih.gov/30675060/)
  12. Hong B, Polemikos M, Heissler HE, Hartmann C, Nakamura M, Krauss JK. Challenges in cerebrospinal fluid shunting in patients with glioblastoma. *Fluids Barriers CNS.* 2018; 15:16.  
<https://doi.org/10.1186/s12987-018-0101-x>  
PMID:[29860942](https://pubmed.ncbi.nlm.nih.gov/29860942/)
  13. Stringer BW, De Silva MI, Greenberg Z, Noreña Puerta A, Adams R, Milky B, Zabolocki M, van den Hurk M, Ebert LM, Fairly Bishop C, Conn SJ, Kichenadasse G, Michael MZ, et al. Human cerebrospinal fluid affects chemoradiotherapy sensitivities in tumor cells from patients with glioblastoma. *Sci Adv.* 2023; 9:eadf1332.  
<https://doi.org/10.1126/sciadv.adf1332>  
PMID:[37878712](https://pubmed.ncbi.nlm.nih.gov/37878712/)
  14. Magrassi L, Brambilla F, Viganò R, Di Silvestre D, Benazzi L, Bellantoni G, Danesino GM, Comincini S, Mauri P. Proteomic Analysis on Sequential Samples of Cystic Fluid Obtained from Human Brain Tumors. *Cancers (Basel).* 2023; 15:4070.  
<https://doi.org/10.3390/cancers15164070>  
PMID:[37627098](https://pubmed.ncbi.nlm.nih.gov/37627098/)
  15. Nakamizo S, Sasayama T, Shinohara M, Irino Y, Nishiumi S, Nishihara M, Tanaka H, Tanaka K, Mizukawa K, Itoh T, Taniguchi M, Hosoda K, Yoshida M, Kohmura E. GC/MS-based metabolomic analysis of cerebrospinal fluid (CSF) from glioma patients. *J Neurooncol.* 2013; 113:65–74.  
<https://doi.org/10.1007/s11060-013-1090-x>  
PMID:[23456655](https://pubmed.ncbi.nlm.nih.gov/23456655/)
  16. Visscher PM, Brown MA, McCarthy MI, Yang J. Five years of GWAS discovery. *Am J Hum Genet.* 2012; 90:7–24.  
<https://doi.org/10.1016/j.ajhg.2011.11.029>  
PMID:[22243964](https://pubmed.ncbi.nlm.nih.gov/22243964/)

17. Mountjoy E, Schmidt EM, Carmona M, Schwartzentruber J, Peat G, Miranda A, Fumis L, Hayhurst J, Buniello A, Karim MA, Wright D, Hercules A, Papa E, et al. An open approach to systematically prioritize causal variants and genes at all published human GWAS trait-associated loci. *Nat Genet.* 2021; 53:1527–33.  
<https://doi.org/10.1038/s41588-021-00945-5>  
PMID:[34711957](https://pubmed.ncbi.nlm.nih.gov/34711957/)
18. Flint J. GWAS. *Curr Biol.* 2013; 23:R265–6.  
<https://doi.org/10.1016/j.cub.2013.01.040>  
PMID:[23578868](https://pubmed.ncbi.nlm.nih.gov/23578868/)
19. Melin BS, Barnholtz-Sloan JS, Wrensch MR, Johansen C, Il'yasova D, Kinnersley B, Ostrom QT, Labreche K, Chen Y, Armstrong G, Liu Y, Eckel-Passow JE, Decker PA, et al, and GliomaScan Consortium. Genome-wide association study of glioma subtypes identifies specific differences in genetic susceptibility to glioblastoma and non-glioblastoma tumors. *Nat Genet.* 2017; 49:789–94.  
<https://doi.org/10.1038/ng.3823>  
PMID:[28346443](https://pubmed.ncbi.nlm.nih.gov/28346443/)
20. Zuber V, Grinberg NF, Gill D, Manipur I, Slob EAW, Patel A, Wallace C, Burgess S. Combining evidence from Mendelian randomization and colocalization: Review and comparison of approaches. *Am J Hum Genet.* 2022; 109:767–82.  
<https://doi.org/10.1016/j.ajhg.2022.04.001>  
PMID:[35452592](https://pubmed.ncbi.nlm.nih.gov/35452592/)
21. Julian TH, Boddy S, Islam M, Kurz J, Whittaker KJ, Moll T, Harvey C, Zhang S, Snyder MP, McDermott C, Cooper-Knock J, Shaw PJ. A review of Mendelian randomization in amyotrophic lateral sclerosis. *Brain.* 2022; 145:832–42.  
<https://doi.org/10.1093/brain/awab420>  
PMID:[34791088](https://pubmed.ncbi.nlm.nih.gov/34791088/)
22. Saunders CN, Cornish AJ, Kinnersley B, Law PJ, Houlston RS, and Collaborators. Searching for causal relationships of glioma: a phenome-wide Mendelian randomisation study. *Br J Cancer.* 2021; 124:447–54.  
<https://doi.org/10.1038/s41416-020-01083-1>  
PMID:[33020596](https://pubmed.ncbi.nlm.nih.gov/33020596/)
23. Zeng C, Zhang C, He C, Song H. Investigating the causal impact of gut microbiota on glioblastoma: a bidirectional Mendelian randomization study. *BMC Genomics.* 2023; 24:784.  
<https://doi.org/10.1186/s12864-023-09885-2>  
PMID:[38110895](https://pubmed.ncbi.nlm.nih.gov/38110895/)
24. Chen Y, Lu T, Pettersson-Kymmer U, Stewart ID, Butler-Laporte G, Nakanishi T, Cerani A, Liang KYH, Yoshiji S, Willett JDS, Su CY, Raina P, Greenwood CMT, et al. Genomic atlas of the plasma metabolome prioritizes metabolites implicated in human diseases. *Nat Genet.* 2023; 55:44–53.  
<https://doi.org/10.1038/s41588-022-01270-1>  
PMID:[36635386](https://pubmed.ncbi.nlm.nih.gov/36635386/)
25. Panyard DJ, Kim KM, Darst BF, Deming YK, Zhong X, Wu Y, Kang H, Carlsson CM, Johnson SC, Asthana S, Engelman CD, Lu Q. Cerebrospinal fluid metabolomics identifies 19 brain-related phenotype associations. *Commun Biol.* 2021; 4:63.  
<https://doi.org/10.1038/s42003-020-01583-z>  
PMID:[33437055](https://pubmed.ncbi.nlm.nih.gov/33437055/)
26. Gatarek P, Kaluzna-Czaplinska J. Trimethylamine N-oxide (TMAO) in human health. *EXCLI J.* 2021; 20:301–19.  
<https://doi.org/10.17179/excli2020-3239>  
PMID:[33746664](https://pubmed.ncbi.nlm.nih.gov/33746664/)
27. Tang WH, Hazen SL. Microbiome, trimethylamine N-oxide, and cardiometabolic disease. *Transl Res.* 2017; 179:108–15.  
<https://doi.org/10.1016/j.trsl.2016.07.007>  
PMID:[27490453](https://pubmed.ncbi.nlm.nih.gov/27490453/)
28. Nowiński A, Ufnal M. Trimethylamine N-oxide: A harmful, protective or diagnostic marker in lifestyle diseases? *Nutrition.* 2018; 46:7–12.  
<https://doi.org/10.1016/j.nut.2017.08.001>  
PMID:[29290360](https://pubmed.ncbi.nlm.nih.gov/29290360/)
29. Jalandra R, Dalal N, Yadav AK, Verma D, Sharma M, Singh R, Khosla A, Kumar A, Solanki PR. Emerging role of trimethylamine-N-oxide (TMAO) in colorectal cancer. *Appl Microbiol Biotechnol.* 2021; 105:7651–60.  
<https://doi.org/10.1007/s00253-021-11582-7>  
PMID:[34568962](https://pubmed.ncbi.nlm.nih.gov/34568962/)
30. Saaoud F, Liu L, Xu K, Cueto R, Shao Y, Lu Y, Sun Y, Snyder NW, Wu S, Yang L, Zhou Y, Williams DL, Li C, et al. Aorta- and liver-generated TMAO enhances trained immunity for increased inflammation via ER stress/mitochondrial ROS/glycolysis pathways. *JCI Insight.* 2023; 8:e158183.  
<https://doi.org/10.1172/jci.insight.158183>  
PMID:[36394956](https://pubmed.ncbi.nlm.nih.gov/36394956/)
31. Constantino-Jonapa LA, Espinoza-Palacios Y, Escalona-Montaño AR, Hernández-Ruiz P, Amezcua-Guerra LM, Amedei A, Aguirre-García MM. Contribution of Trimethylamine N-Oxide (TMAO) to Chronic Inflammatory and Degenerative Diseases. *Biomedicines.* 2023; 11:431.  
<https://doi.org/10.3390/biomedicines11020431>  
PMID:[36830968](https://pubmed.ncbi.nlm.nih.gov/36830968/)
32. Manjili SH, Isbell M, Ghochaghi N, Perkinson T, Manjili MH. Multifaceted functions of chronic inflammation in regulating tumor dormancy and relapse. *Semin Cancer Biol.* 2022; 78:17–22.

- <https://doi.org/10.1016/j.semcan.2021.03.023>  
PMID:[33785450](https://pubmed.ncbi.nlm.nih.gov/33785450/)
33. Coussens LM, Werb Z. Inflammation and cancer. *Nature*. 2002; 420:860–7.  
<https://doi.org/10.1038/nature01322>  
PMID:[12490959](https://pubmed.ncbi.nlm.nih.gov/12490959/)
34. Yang S, Dai H, Lu Y, Li R, Gao C, Pan S. Trimethylamine N-Oxide Promotes Cell Proliferation and Angiogenesis in Colorectal Cancer. *J Immunol Res*. 2022; 2022:7043856.  
<https://doi.org/10.1155/2022/7043856>  
PMID:[35832644](https://pubmed.ncbi.nlm.nih.gov/35832644/)
35. Yang G, Zhang X. TMAO promotes apoptosis and oxidative stress of pancreatic acinar cells by mediating IRE1 $\alpha$ -XBP-1 pathway. *Saudi J Gastroenterol*. 2021; 27:361–9.  
[https://doi.org/10.4103/sjg.sjg\\_12\\_21](https://doi.org/10.4103/sjg.sjg_12_21)  
PMID:[34755714](https://pubmed.ncbi.nlm.nih.gov/34755714/)
36. Yang C, Farias FHG, Ibanez L, Suhy A, Sadler B, Fernandez MV, Wang F, Bradley JL, Eiffert B, Bahena JA, Budde JP, Li Z, Dube U, et al. Genomic atlas of the proteome from brain, CSF and plasma prioritizes proteins implicated in neurological disorders. *Nat Neurosci*. 2021; 24:1302–12.  
<https://doi.org/10.1038/s41593-021-00886-6>  
PMID:[34239129](https://pubmed.ncbi.nlm.nih.gov/34239129/)
37. Dong L, Zieren RC, Horie K, Kim CJ, Mallick E, Jing Y, Feng M, Kuczler MD, Green J, Amend SR, Witwer KW, de Reijke TM, Cho YK, et al. Comprehensive evaluation of methods for small extracellular vesicles separation from human plasma, urine and cell culture medium. *J Extracell Vesicles*. 2020; 10:e12044.  
<https://doi.org/10.1002/jev2.12044>  
PMID:[33489012](https://pubmed.ncbi.nlm.nih.gov/33489012/)
38. Rasmussen MK, Mestre H, Nedergaard M. Fluid transport in the brain. *Physiol Rev*. 2022; 102:1025–151.  
<https://doi.org/10.1152/physrev.00031.2020>  
PMID:[33949874](https://pubmed.ncbi.nlm.nih.gov/33949874/)
39. Obermeier B, Daneman R, Ransohoff RM. Development, maintenance and disruption of the blood-brain barrier. *Nat Med*. 2013; 19:1584–96.  
<https://doi.org/10.1038/nm.3407>  
PMID:[24309662](https://pubmed.ncbi.nlm.nih.gov/24309662/)
40. Zhao Z, Nelson AR, Betsholtz C, Zlokovic BV. Establishment and Dysfunction of the Blood-Brain Barrier. *Cell*. 2015; 163:1064–78.  
<https://doi.org/10.1016/j.cell.2015.10.067>  
PMID:[26590417](https://pubmed.ncbi.nlm.nih.gov/26590417/)
41. Profaci CP, Munji RN, Pulido RS, Daneman R. The blood-brain barrier in health and disease: Important unanswered questions. *J Exp Med*. 2020; 217:e20190062.  
<https://doi.org/10.1084/jem.20190062>  
PMID:[32211826](https://pubmed.ncbi.nlm.nih.gov/32211826/)
42. Helms HC, Abbott NJ, Burek M, Cecchelli R, Couraud PO, Deli MA, Förster C, Galla HJ, Romero IA, Shusta EV, Stebbins MJ, Vandenhoute E, Weksler B, Brodin B. In vitro models of the blood-brain barrier: An overview of commonly used brain endothelial cell culture models and guidelines for their use. *J Cereb Blood Flow Metab*. 2016; 36:862–90.  
<https://doi.org/10.1177/0271678X16630991>  
PMID:[26868179](https://pubmed.ncbi.nlm.nih.gov/26868179/)
43. Braniste V, Al-Asmakh M, Kowal C, Anuar F, Abbaspour A, Tóth M, Korecka A, Bakocevic N, Ng LG, Kundu P, Gulyás B, Halldin C, Hultenby K, et al. The gut microbiota influences blood-brain barrier permeability in mice. *Sci Transl Med*. 2014; 6:263ra158.  
<https://doi.org/10.1126/scitranslmed.3009759>  
PMID:[25411471](https://pubmed.ncbi.nlm.nih.gov/25411471/)
44. Zhao Z, Ning J, Bao XQ, Shang M, Ma J, Li G, Zhang D. Fecal microbiota transplantation protects rotenone-induced Parkinson's disease mice via suppressing inflammation mediated by the lipopolysaccharide-TLR4 signaling pathway through the microbiota-gut-brain axis. *Microbiome*. 2021; 9:226.  
<https://doi.org/10.1186/s40168-021-01107-9>  
PMID:[34784980](https://pubmed.ncbi.nlm.nih.gov/34784980/)
45. Joshi U, Pearson A, Evans JE, Langlois H, Saltiel N, Ojo J, Klimas N, Sullivan K, Keegan AP, Oberlin S, Darcey T, Cseresznye A, Raya B, et al. A permethrin metabolite is associated with adaptive immune responses in Gulf War Illness. *Brain Behav Immun*. 2019; 81:545–59.  
<https://doi.org/10.1016/j.bbi.2019.07.015>  
PMID:[31325531](https://pubmed.ncbi.nlm.nih.gov/31325531/)
46. Li JH, He ZQ, Lin FH, Chen ZH, Yang SY, Duan H, Jiang XB, Al-Nahari F, Zhang XH, Wang JH, Zhang GH, Zhang ZF, Li C, Mou YG. Assessment of ctDNA in CSF may be a more rapid means of assessing surgical outcomes than plasma ctDNA in glioblastoma. *Mol Cell Probes*. 2019; 46:101411.  
<https://doi.org/10.1016/j.mcp.2019.06.001>  
PMID:[31173881](https://pubmed.ncbi.nlm.nih.gov/31173881/)

## SUPPLEMENTARY MATERIALS

### Supplementary Tables

**Supplementary Table 1. Two-sample MR analysis results of Trimethylamine N-oxide levels on GBM, including heterogeneity test and horizontal pleiotropy test.**

| Method                    | nsnp | b      | se     | p-val  | lo_ci   | up_ci  | or     | or_lci95 | or_uci95 | heterogeneity_Q_p-val | pleiotropy-p-val |
|---------------------------|------|--------|--------|--------|---------|--------|--------|----------|----------|-----------------------|------------------|
| MR Egger                  | 15   | 1.5187 | 0.8595 | 0.1007 | -0.1659 | 3.2033 | 4.5662 | 0.8471   | 24.6140  | 0.5742                |                  |
| Weighted median           | 15   | 0.9542 | 0.4695 | 0.0421 | 0.0340  | 1.8743 | 2.5965 | 1.0346   | 6.5163   |                       |                  |
| Inverse variance weighted | 15   | 1.1514 | 0.3367 | 0.0006 | 0.4915  | 1.8114 | 3.1627 | 1.6347   | 6.1189   | 0.1853                | 0.4306           |
| Simple mode               | 15   | 1.0580 | 0.7415 | 0.1755 | -0.3953 | 2.5113 | 2.8805 | 0.6735   | 12.3205  |                       |                  |
| Weighted mode             | 15   | 0.9992 | 0.6643 | 0.1548 | -0.3028 | 2.3012 | 2.7161 | 0.7388   | 9.9859   |                       |                  |

**Supplementary Table 2. Two-sample MR analysis results of GBM on Trimethylamine N-oxide levels.**

| Method                    | nsnp | b       | se     | p-val  | lo_ci   | up_ci  | or     | or_lci95 | or_uci95 | heterogeneity_Q_p-val | pleiotropy-p-val |
|---------------------------|------|---------|--------|--------|---------|--------|--------|----------|----------|-----------------------|------------------|
| MR Egger                  | 8    | -0.0029 | 0.0349 | 0.9361 | -0.0713 | 0.0654 | 0.9971 | 0.9312   | 1.0676   | 0.6968                |                  |
| Weighted median           | 8    | -0.0149 | 0.0199 | 0.4539 | -0.0539 | 0.0241 | 0.9852 | 0.9475   | 1.0244   |                       |                  |
| Inverse variance weighted | 8    | -0.0217 | 0.0151 | 0.1502 | -0.0514 | 0.0079 | 0.9785 | 0.9499   | 1.0079   | 0.7553                | 0.5711           |
| Simple mode               | 8    | -0.0181 | 0.0253 | 0.4981 | -0.0676 | 0.0315 | 0.9821 | 0.9346   | 1.0320   |                       |                  |
| Weighted mode             | 8    | -0.0161 | 0.0230 | 0.5058 | -0.0611 | 0.0289 | 0.9840 | 0.9407   | 1.0293   |                       |                  |

**Supplementary Table 3. Two-sample MR analysis results of Trimethylamine N-oxide levels in CSF on GBM.**

| Method                    | nsnp | b       | se     | p-val  | lo_ci   | up_ci  | or     | or_lci95 | or_uci95 | heterogeneity_Q_p-val | pleiotropy-p-val |
|---------------------------|------|---------|--------|--------|---------|--------|--------|----------|----------|-----------------------|------------------|
| MR Egger                  | 56   | 0.2287  | 0.4165 | 0.5852 | -0.5876 | 1.0449 | 1.2569 | 0.5557   | 2.8431   | 0.0626                |                  |
| Weighted median           | 56   | 0.2024  | 0.3155 | 0.5212 | -0.4160 | 0.8207 | 1.2243 | 0.6597   | 2.2721   |                       |                  |
| Inverse variance weighted | 56   | 0.1868  | 0.2304 | 0.4175 | -0.2648 | 0.6384 | 1.2054 | 0.7674   | 1.8934   | 0.0745                | 0.9040           |
| Simple mode               | 56   | -0.8097 | 0.7073 | 0.2573 | -2.1960 | 0.5767 | 0.4450 | 0.1112   | 1.7801   |                       |                  |
| Weighted mode             | 56   | 0.1891  | 0.5442 | 0.7295 | -0.8774 | 1.2557 | 1.2082 | 0.4159   | 3.5103   |                       |                  |
