# Supplementary material for: Deciphering the causal relationship between plasma and cerebrospinal fluid metabolites and glioblastoma multiforme: a Mendelian Randomization study
Source: publisher site journal article supplement (doi:10.18632/aging.205818), 2024-05-10
Supplement: Supplementary file [file aging-v16i9-205818-supplementary-material-SD1.pdf]

## SUPPLEMENTARY TABLES

**Supplementary Table 1. Two-sample MR analysis results of Trimethylamine N-oxide levels on GBM, including heterogeneity test and horizontal pleiotropy test.**

| Method                    | nsnp | b      | se     | p-val  | lo_ci   | up_ci  | or     | or_lci95 | or_uci95 | heterogeneity_Q_p-val | pleiotropy-p-val |
|---------------------------|------|--------|--------|--------|---------|--------|--------|----------|----------|-----------------------|------------------|
| MR Egger                  | 15   | 1.5187 | 0.8595 | 0.1007 | -0.1659 | 3.2033 | 4.5662 | 0.8471   | 24.6140  | 0.5742                |                  |
| Weighted median           | 15   | 0.9542 | 0.4695 | 0.0421 | 0.0340  | 1.8743 | 2.5965 | 1.0346   | 6.5163   |                       |                  |
| Inverse variance weighted | 15   | 1.1514 | 0.3367 | 0.0006 | 0.4915  | 1.8114 | 3.1627 | 1.6347   | 6.1189   | 0.1853                | 0.4306           |
| Simple mode               | 15   | 1.0580 | 0.7415 | 0.1755 | -0.3953 | 2.5113 | 2.8805 | 0.6735   | 12.3205  |                       |                  |
| Weighted mode             | 15   | 0.9992 | 0.6643 | 0.1548 | -0.3028 | 2.3012 | 2.7161 | 0.7388   | 9.9859   |                       |                  |

**Supplementary Table 2. Two-sample MR analysis results of GBM on Trimethylamine N-oxide levels.**

| Method                    | nsnp | b       | se     | p-val  | lo_ci   | up_ci  | or     | or_lci95 | or_uci95 | heterogeneity_Q_p-val | pleiotropy-p-val |
|---------------------------|------|---------|--------|--------|---------|--------|--------|----------|----------|-----------------------|------------------|
| MR Egger                  | 8    | -0.0029 | 0.0349 | 0.9361 | -0.0713 | 0.0654 | 0.9971 | 0.9312   | 1.0676   | 0.6968                |                  |
| Weighted median           | 8    | -0.0149 | 0.0199 | 0.4539 | -0.0539 | 0.0241 | 0.9852 | 0.9475   | 1.0244   |                       |                  |
| Inverse variance weighted | 8    | -0.0217 | 0.0151 | 0.1502 | -0.0514 | 0.0079 | 0.9785 | 0.9499   | 1.0079   | 0.7553                | 0.5711           |
| Simple mode               | 8    | -0.0181 | 0.0253 | 0.4981 | -0.0676 | 0.0315 | 0.9821 | 0.9346   | 1.0320   |                       |                  |
| Weighted mode             | 8    | -0.0161 | 0.0230 | 0.5058 | -0.0611 | 0.0289 | 0.9840 | 0.9407   | 1.0293   |                       |                  |

**Supplementary Table 3. Two-sample MR analysis results of Trimethylamine N-oxide levels in CSF on GBM.**

| Method                    | nsnp | b       | se     | p-val  | lo_ci   | up_ci  | or     | or_lci95 | or_uci95 | heterogeneity_Q_p-val | pleiotropy-p-val |
|---------------------------|------|---------|--------|--------|---------|--------|--------|----------|----------|-----------------------|------------------|
| MR Egger                  | 56   | 0.2287  | 0.4165 | 0.5852 | -0.5876 | 1.0449 | 1.2569 | 0.5557   | 2.8431   | 0.0626                |                  |
| Weighted median           | 56   | 0.2024  | 0.3155 | 0.5212 | -0.4160 | 0.8207 | 1.2243 | 0.6597   | 2.2721   |                       |                  |
| Inverse variance weighted | 56   | 0.1868  | 0.2304 | 0.4175 | -0.2648 | 0.6384 | 1.2054 | 0.7674   | 1.8934   | 0.0745                | 0.9040           |
| Simple mode               | 56   | -0.8097 | 0.7073 | 0.2573 | -2.1960 | 0.5767 | 0.4450 | 0.1112   | 1.7801   |                       |                  |
| Weighted mode             | 56   | 0.1891  | 0.5442 | 0.7295 | -0.8774 | 1.2557 | 1.2082 | 0.4159   | 3.5103   |                       |                  |
